# Supplementary material for: Optimizing genetic ancestry adjustment in DNA methylation studies: a comparative analysis of approaches
Source: Epigenetics Chromatin. 2025 Oct 14;18:69. doi: 10.1186/s13072-025-00627-0 (PMC12522430; doi:10.1186/s13072-025-00627-0)
Supplement: Supplementary file 17 — Supplementary Table S1 [file 13072_2025_627_MOESM17_ESM.xlsx]

## Sheet: A) Silhouette scores
cohort	method	mean_silhouette_score
BCBP-OCD	EpiAncOrig	-0.311898
BCBP-OCD	EpiAnceR	0.282441
BCBP-OCD	EpiAnceR+	0.324712
TOP	EpiAncOrig	-0.0133117
TOP	EpiAnceR	-0.00826297
TOP	EpiAnceR+	0.0126957

## Sheet: B) Distance from centroid
cohort	method	mean_distance_from_centroid
BCBP-OCD	EpiAncOrig	0.0585018
BCBP-OCD	EpiAnceR	0.0131993
BCBP-OCD	EpiAnceR+	0.0117455
TOP	EpiAncOrig	0.197605
TOP	EpiAnceR	0.0378441
TOP	EpiAnceR+	0.0100151
