# Supplementary material for: Optimizing genetic ancestry adjustment in DNA methylation studies: a comparative analysis of approaches
Source: Epigenetics Chromatin. 2025 Oct 14;18:69. doi: 10.1186/s13072-025-00627-0 (PMC12522430; doi:10.1186/s13072-025-00627-0)
Supplement: Supplementary file 18 — Supplementary Table S2 [file 13072_2025_627_MOESM18_ESM.xlsx]

## Sheet: A) Mean silhouette scores
cohort	method	mean_sil
BCBP-OCD	EpiAncOrig	0.24779
BCBP-OCD	EpiAnceR	0.254112
BCBP-OCD	EpiAnceR+	0.293458
TOP	EpiAncOrig	0.0696372
TOP	EpiAnceR	0.0141682
TOP	EpiAnceR+	0.250189
GTP	EpiAncOrig	0.598999
GTP	EpiAnceR	0.557948
GTP	EpiAnceR+	0.573195
UTHealth_Houston	EpiAncOrig	0.0726752
UTHealth_Houston	EpiAnceR	-0.0566706
UTHealth_Houston	EpiAnceR+	-0.00825751

## Sheet: B) Ancestry silhouette scores
cohort	method	label	mean_silhouette
BCBP-OCD	EpiAncOrig	AFR	0.927465
BCBP-OCD	EpiAncOrig	AMR	0.384071
BCBP-OCD	EpiAncOrig	EAS	0.362134
BCBP-OCD	EpiAncOrig	EUR	0.24295
BCBP-OCD	EpiAncOrig	SAS	0.381847
BCBP-OCD	EpiAnceR	AFR	0.955867
BCBP-OCD	EpiAnceR	AMR	0.963453
BCBP-OCD	EpiAnceR	EAS	0.574723
BCBP-OCD	EpiAnceR	EUR	0.247164
BCBP-OCD	EpiAnceR	SAS	0.210571
BCBP-OCD	EpiAnceR+	AFR	0.964002
BCBP-OCD	EpiAnceR+	AMR	0.976519
BCBP-OCD	EpiAnceR+	EAS	0.611573
BCBP-OCD	EpiAnceR+	EUR	0.284942
BCBP-OCD	EpiAnceR+	SAS	0.413225
TOP	EpiAncOrig	AFR	0.244866
TOP	EpiAncOrig	EAS	0.121825
TOP	EpiAncOrig	EUR	0.0711726
TOP	EpiAncOrig	SAS	0.00744568
TOP	EpiAnceR	AFR	0.410218
TOP	EpiAnceR	EAS	0.0756565
TOP	EpiAnceR	EUR	-0.000895197
TOP	EpiAnceR	SAS	0.0114053
TOP	EpiAnceR+	AFR	0.489642
TOP	EpiAnceR+	EAS	0.520937
TOP	EpiAnceR+	EUR	0.272518
TOP	EpiAnceR+	SAS	-0.0457145
GTP	EpiAncOrig	AFR	0.595638
GTP	EpiAncOrig	EUR	0.69927
GTP	EpiAnceR	AFR	0.553952
GTP	EpiAnceR	EUR	0.677158
GTP	EpiAnceR+	AFR	0.569838
GTP	EpiAnceR+	EUR	0.673351
GTHealth_Houston	EpiAncOrig	AFR	0.602771
GTHealth_Houston	EpiAncOrig	AMR	0.60923
GTHealth_Houston	EpiAncOrig	EAS/SAS	-0.399828
GTHealth_Houston	EpiAncOrig	EUR	-0.330288
GTHealth_Houston	EpiAncOrig	LAT	0.104094
GTHealth_Houston	EpiAncOrig	PI	0
GTHealth_Houston	EpiAnceR	AFR	0.193593
GTHealth_Houston	EpiAnceR	AMR	0.298918
GTHealth_Houston	EpiAnceR	EAS/SAS	-0.548246
GTHealth_Houston	EpiAnceR	EUR	-0.300055
GTHealth_Houston	EpiAnceR	LAT	0.133961
GTHealth_Houston	EpiAnceR	PI	0
GTHealth_Houston	EpiAnceR+	AFR	0.3317
GTHealth_Houston	EpiAnceR+	AMR	0.507665
GTHealth_Houston	EpiAnceR+	EAS/SAS	-0.573031
GTHealth_Houston	EpiAnceR+	EUR	-0.318557
GTHealth_Houston	EpiAnceR+	LAT	0.181003
GTHealth_Houston	EpiAnceR+	PI	0

## Sheet: C) Mean distances
cohort	anc_classif	method	mean_within_dist_3D	mean_between_dist_3D
BCBP-OCD	AFR	EpiAncOrig	0.0189442	0.46458
BCBP-OCD	AMR	EpiAncOrig	0.0897156	0.315828
BCBP-OCD	EAS	EpiAncOrig	0.207811	0.485508
BCBP-OCD	EUR	EpiAncOrig	0.200067	0.455027
BCBP-OCD	SAS	EpiAncOrig	0.0959353	0.29835
BCBP-OCD	AFR	EpiAnceR	0.0110434	0.488397
BCBP-OCD	AMR	EpiAnceR	0.00857104	0.38769
BCBP-OCD	EAS	EpiAnceR	0.148685	0.53801
BCBP-OCD	EUR	EpiAnceR	0.220799	0.47798
BCBP-OCD	SAS	EpiAnceR	0.197486	0.350868
BCBP-OCD	AFR	EpiAnceR+	0.0106519	0.51401
BCBP-OCD	AMR	EpiAnceR+	0.00671115	0.453145
BCBP-OCD	EAS	EpiAnceR+	0.15782	0.550476
BCBP-OCD	EUR	EpiAnceR+	0.217938	0.494022
BCBP-OCD	SAS	EpiAnceR+	0.183362	0.401256
TOP	AFR	EpiAncOrig	0.243771	0.403191
TOP	EAS	EpiAncOrig	0.246779	0.236194
TOP	EUR	EpiAncOrig	0.240446	0.287359
TOP	SAS	EpiAncOrig	0.240131	0.22874
TOP	AFR	EpiAnceR	0.272813	0.485066
TOP	EAS	EpiAnceR	0.236226	0.267232
TOP	EUR	EpiAnceR	0.237398	0.269423
TOP	SAS	EpiAnceR	0.21976	0.23715
TOP	AFR	EpiAnceR+	0.232665	0.555601
TOP	EAS	EpiAnceR+	0.141493	0.42299
TOP	EUR	EpiAnceR+	0.189897	0.394516
TOP	SAS	EpiAnceR+	0.239484	0.312716
GTP	African	EpiAncOrig	0.231662	0.377072
GTP	European	EpiAncOrig	0.1761	0.377072
GTP	African	EpiAnceR	0.223454	0.325668
GTP	European	EpiAnceR	0.159279	0.325668
GTP	African	EpiAnceR+	0.233946	0.353933
GTP	European	EpiAnceR+	0.17514	0.353933
UTHealth_Houston	AFR	EpiAncOrig	0.18006	0.582622
UTHealth_Houston	AMR	EpiAncOrig	0.0300153	0.405049
UTHealth_Houston	EAS/SAS	EpiAncOrig	0.289535	0.43098
UTHealth_Houston	EUR	EpiAncOrig	0.139594	0.393754
UTHealth_Houston	LAT	EpiAncOrig	0.191486	0.334228
UTHealth_Houston	PI	EpiAncOrig	0	0.465558
UTHealth_Houston	AFR	EpiAnceR	0.1691	0.37531
UTHealth_Houston	AMR	EpiAnceR	0.0563279	0.35361
UTHealth_Houston	EAS/SAS	EpiAnceR	0.324403	0.427579
UTHealth_Houston	EUR	EpiAnceR	0.144844	0.333006
UTHealth_Houston	LAT	EpiAnceR	0.203178	0.362629
UTHealth_Houston	PI	EpiAnceR	0	0.511722
UTHealth_Houston	AFR	EpiAnceR+	0.156874	0.403625
UTHealth_Houston	AMR	EpiAnceR+	0.0370663	0.376121
UTHealth_Houston	EAS/SAS	EpiAnceR+	0.324846	0.437562
UTHealth_Houston	EUR	EpiAnceR+	0.135015	0.347705
UTHealth_Houston	LAT	EpiAnceR+	0.194971	0.380419
UTHealth_Houston	PI	EpiAnceR+	0	0.529042
