# Supplementary material for: Optimizing genetic ancestry adjustment in DNA methylation studies: a comparative analysis of approaches
Source: Epigenetics Chromatin. 2025 Oct 14;18:69. doi: 10.1186/s13072-025-00627-0 (PMC12522430; doi:10.1186/s13072-025-00627-0)
Supplement: Supplementary file 19 — Supplementary Table S3 [file 13072_2025_627_MOESM19_ESM.xlsx]

## Sheet: A) BCBP-OCD
dep_variable	Sum Sq	Mean Sq	F value	Pr(>F)
age	403.625	100.906	1.11248	0.349791
sex	0.284088	0.0710221	0.334131	0.855002
dep_variable	PC	npar	AIC	BIC	logLik	deviance	Chisq	Pr(>Chisq)
cell_PCs	1	3	3305.18	3320.58	-1649.59	3299.18
cell_PCs	1	7	3308.6	3344.54	-1647.3	3294.6	4.58137	0.333007
cell_PCs	2	3	3475.48	3490.88	-1734.74	3469.48
cell_PCs	2	7	3478.29	3514.23	-1732.14	3464.29	5.19189	0.268169
cell_PCs	3	3	3561.23	3576.63	-1777.61	3555.23
cell_PCs	3	7	3567.9	3603.83	-1776.95	3553.9	1.33347	0.855673
ctrl_PCs	1	3	2870.26	2885.66	-1432.13	2864.26
ctrl_PCs	1	7	2874.09	2910.03	-1430.05	2860.09	4.16477	0.384166
ctrl_PCs	2	3	3136.87	3152.27	-1565.44	3130.87
ctrl_PCs	2	7	3143.09	3179.03	-1564.54	3129.09	1.7812	0.77592
ctrl_PCs	3	3	2275.83	2291.24	-1134.92	2269.83
ctrl_PCs	3	7	2282.85	2318.79	-1134.43	2268.85	0.980236	0.912778
ctrl_PCs	4	3	2462.2	2477.6	-1228.1	2456.2
ctrl_PCs	4	7	2468.23	2504.16	-1227.11	2454.23	1.97011	0.741257
ctrl_PCs	5	3	3158.94	3174.34	-1576.47	3152.94
ctrl_PCs	5	7	3163.97	3199.91	-1574.99	3149.97	2.96771	0.563244
ctrl_PCs	6	3	2787.01	2802.42	-1390.51	2781.01
ctrl_PCs	6	7	2792.43	2828.37	-1389.21	2778.43	2.58424	0.629617
ctrl_PCs	7	3	2876.62	2892.02	-1435.31	2870.62
ctrl_PCs	7	7	2881.16	2917.09	-1433.58	2867.16	3.45955	0.484055
ctrl_PCs	8	3	3087.88	3103.29	-1540.94	3081.88
ctrl_PCs	8	7	3094.01	3129.95	-1540	3080.01	1.87515	0.758708
ctrl_PCs	9	3	3084.22	3099.63	-1539.11	3078.22
ctrl_PCs	9	7	3090.96	3126.9	-1538.48	3076.96	1.26543	0.867213
ctrl_PCs	10	3	3303.7	3319.1	-1648.85	3297.7
ctrl_PCs	10	7	3308.91	3344.84	-1647.45	3294.91	2.79228	0.593167

## Sheet: B) TOP
dep_variable	Sum Sq	Mean Sq	F value	Pr(>F)
age	157.476	52.492	0.628545	0.597055
sex	2.10189	0.700629	2.84668	0.0377803
dep_variable	PC	npar	AIC	BIC	logLik	deviance	Chisq	Pr(>Chisq)
cell_PCs	1	3	890.597	901.864	-442.298	884.597
cell_PCs	1	6	886.434	908.969	-437.217	874.434	10.1625	0.017234
cell_PCs	2	3	900.749	912.016	-447.374	894.749
cell_PCs	2	6	892.619	915.153	-440.309	880.619	14.1301	0.00273334
cell_PCs	3	3	897.21	908.477	-445.605	891.21
cell_PCs	3	6	898.441	920.976	-443.221	886.441	4.76872	0.189537
cell_PCs	4	3	893.971	905.238	-443.985	887.971
cell_PCs	4	6	880.171	902.705	-434.085	868.171	19.8002	0.000186719
cell_PCs	5	3	896.18	907.448	-445.09	890.18
cell_PCs	5	6	891.065	913.599	-439.532	879.065	11.1156	0.0111169
ctrl_PCs	1	3	900.739	912.006	-447.369	894.739
ctrl_PCs	1	6	900.853	923.388	-444.427	888.853	5.88554	0.117314
ctrl_PCs	2	3	901.728	912.995	-447.864	895.728
ctrl_PCs	2	6	903.961	926.496	-445.981	891.961	3.76692	0.287758
ctrl_PCs	3	3	901.768	913.035	-447.884	895.768
ctrl_PCs	3	6	906.273	928.807	-447.136	894.273	1.49506	0.683411
ctrl_PCs	4	3	901.574	912.842	-447.787	895.574
ctrl_PCs	4	6	902.76	925.294	-445.38	890.76	4.81447	0.185898
ctrl_PCs	5	3	901.767	913.035	-447.884	895.767
ctrl_PCs	5	6	906.032	928.566	-447.016	894.032	1.73548	0.629074
ctrl_PCs	6	3	897.67	908.937	-445.835	891.67
ctrl_PCs	6	6	892.816	915.351	-440.408	880.816	10.8534	0.0125458
ctrl_PCs	7	3	901.768	913.035	-447.884	895.768
ctrl_PCs	7	6	900.854	923.388	-444.427	888.854	6.9138	0.0746965
ctrl_PCs	8	3	900.155	911.422	-447.077	894.155
ctrl_PCs	8	6	905.516	928.05	-446.758	893.516	0.638987	0.887452
ctrl_PCs	9	3	901.212	912.479	-447.606	895.212
ctrl_PCs	9	6	902.168	924.703	-445.084	890.168	5.04398	0.168605
ctrl_PCs	10	3	901.53	912.798	-447.765	895.53
ctrl_PCs	10	6	902.062	924.597	-445.031	890.062	5.46789	0.140572

## Sheet: C) GTP
	Beta	SE	tstat	pval
Age	5.02025	2.53491	1.98045	0.0480242
Sex	-0.0984637	0.0932031	-1.05644	0.291112
PC1	2531.88	5860.05	0.432057	0.665826
PC2	-5595.92	2504.62	-2.23424	0.0257662
PC3	-2653.62	1573.42	-1.68653	0.0921158
PC4	-2459.01	1037.71	-2.36966	0.0180607
PC5	-179.853	893.475	-0.201296	0.840523
PC6	-454.132	576.292	-0.788024	0.430935
PC7	394.844	452.711	0.872178	0.383395
PC8	-794.848	418.862	-1.89764	0.0581341
PC9	-1195.53	404.81	-2.95332	0.00324363
PC10	-201.57	347.599	-0.579894	0.562163
Cell_PC1	0.116304	0.0290368	4.00542	6.81789e-05
Cell_PC2	0.0216556	0.0110303	1.96328	0.0499891
Cell_PC3	-0.00435851	0.0062568	-0.696604	0.48627
Cell_PC4	-0.00969032	0.00500213	-1.93724	0.0530973
Cell_PC5	0.00193559	0.0036971	0.523544	0.600753

## Sheet: D) UTHealth_Houston
dep_variable	Sum Sq	Mean Sq	F value	Pr(>F)
age	876.776	175.355	1.45954	0.204231
sex	0.973153	0.194631	0.90439	0.479015
dep_variable	PC	Df	Sum Sq	Mean Sq	F value	Pr(>F)
cell_PCs	1	5	11.2813	2.25626	2.32257	0.0441151
cell_PCs	1	220	213.719	0.971449
cell_PCs	2	5	12.1809	2.43617	2.51837	0.0305646
cell_PCs	2	220	212.819	0.96736
cell_PCs	3	5	4.43774	0.887547	0.885285	0.491711
cell_PCs	3	220	220.562	1.00256
cell_PCs	4	5	5.15656	1.03131	1.03205	0.399596
cell_PCs	4	220	219.843	0.999288
cell_PCs	5	5	3.71356	0.742711	0.738393	0.59542
cell_PCs	5	220	221.286	1.00585
ctrl_PCs	1	5	2.76585	0.553169	0.547608	0.740051
ctrl_PCs	1	220	222.234	1.01016
ctrl_PCs	2	5	4.04453	0.808907	0.805409	0.546867
ctrl_PCs	2	220	220.955	1.00434
ctrl_PCs	3	5	7.56427	1.51285	1.5307	0.181305
ctrl_PCs	3	220	217.436	0.988344
ctrl_PCs	4	5	4.29516	0.859032	0.856289	0.511357
ctrl_PCs	4	220	220.705	1.0032
ctrl_PCs	5	5	5.54726	1.10945	1.11222	0.35475
ctrl_PCs	5	220	219.453	0.997512
ctrl_PCs	6	5	7.42083	1.48417	1.50068	0.190685
ctrl_PCs	6	220	217.579	0.988996
ctrl_PCs	7	5	4.78062	0.956125	0.955172	0.446271
ctrl_PCs	7	220	220.219	1.001
ctrl_PCs	8	5	11.5746	2.31493	2.38624	0.039175
ctrl_PCs	8	220	213.425	0.970115
ctrl_PCs	9	5	60.8621	12.1724	16.3151	1.10325e-13
ctrl_PCs	9	220	164.138	0.746081
ctrl_PCs	10	5	19.7899	3.95798	4.24324	0.00105513
ctrl_PCs	10	220	205.21	0.932773
